# Supplementary material for: DMPC vesicle structure and dynamics in the presence of low amounts of the saponin aescin
Source: Royal Society of Chemistry journal article supplement (doi:10.1039/c7cp08027a), 2018-01-01
Supplement: c7cp08027a1.pdf [file c7cp08027a1.pdf]

# Electronic Supplementary Information

## DMPC vesicle structure and dynamics in the presence of low amounts of the saponin aescin

Ramsia Sreij,<sup>a</sup> Carina Dargel,<sup>a</sup> Philippe Geisler,<sup>b</sup> Yvonne Hertle,<sup>a</sup> Aurel Radulescu,<sup>c</sup> Stefano Pasini,<sup>c</sup> Javier Perez,<sup>d</sup> Lara H. Moleiro,<sup>a</sup> and Thomas Hellweg,<sup>\*a</sup>

<sup>a</sup> Physical and Biophysical Chemistry, Bielefeld University, Bielefeld, Germany.

<sup>b</sup> Cognitronics and Sensor Systems, CITEC, Bielefeld University, Bielefeld, Germany.

<sup>c</sup> Jülich Centre for Neutron Science JCNS at Heinz Maier-Leibnitz Zentrum (MLZ), Forschungszentrum Jülich GmbH, Garching, Germany.

<sup>d</sup> Synchrotron SOLEIL, Gif-sur-Yvette Cedex, France.

\*Email : thomas.hellweg@uni-bielefeld.de

\*Phone : +49(0)521 1062055 Fax : +49(0)521 1062981

### Pair distance distribution functions from SAXS

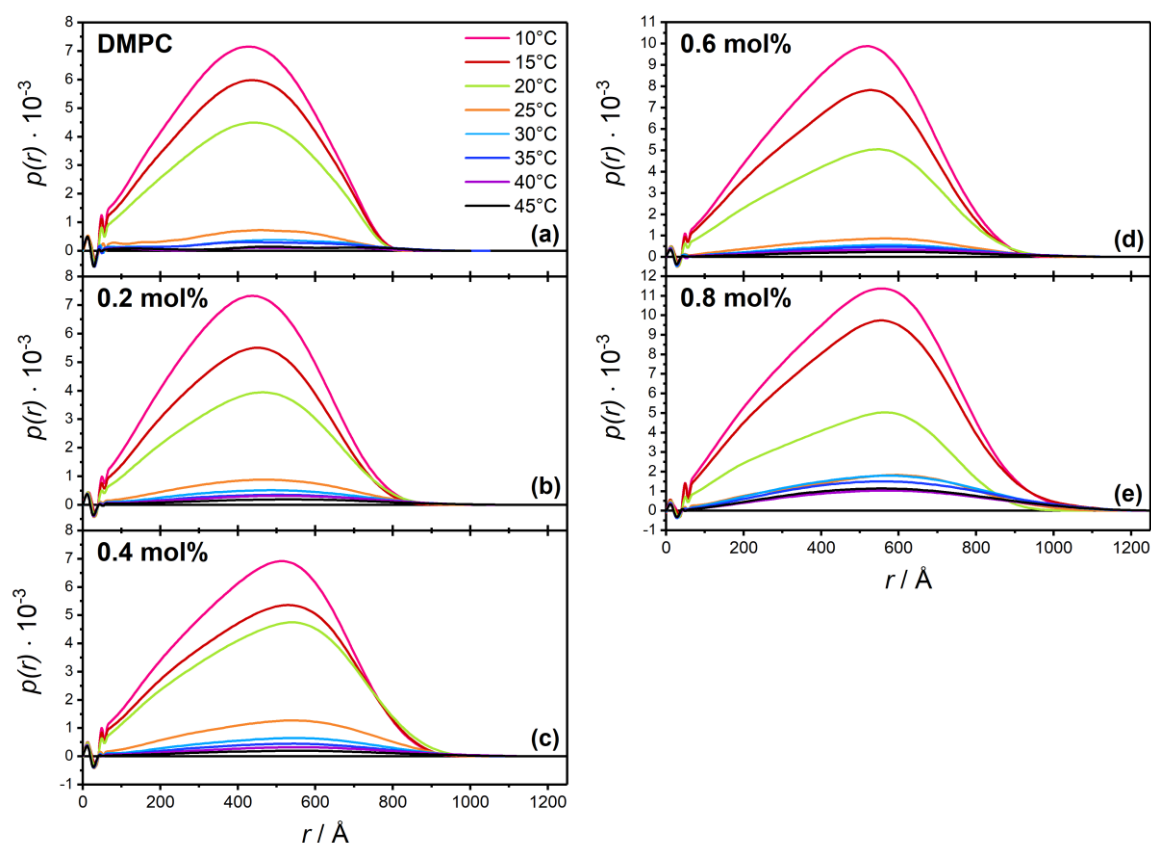

**Figure S1** : Pair distance distribution functions ( $p(r)$ ) of vesicle suspensions of (a) DMPC and (b)-(e) DMPC containing low amounts of aescin in the temperature range between 10 °C and 45 °C in steps of 5 °C. They were obtained from a standard IFT analysis using GIFT.<sup>1</sup>

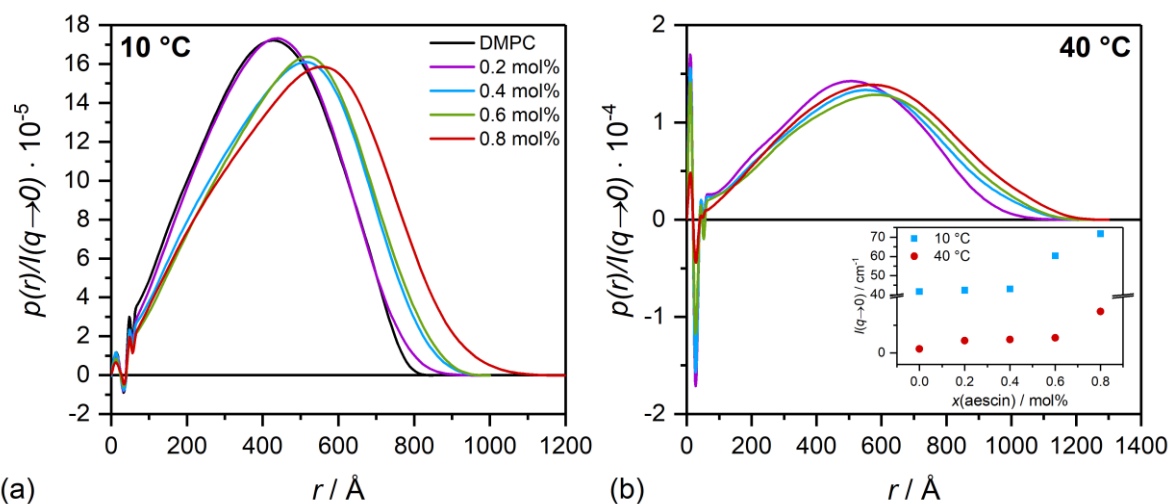

**Figure S2:** Pair distance distribution functions ( $p(r)$ ) of vesicle suspensions of DMPC and DMPC containing low amounts of aescin at 10 °C and 40 °C. These functions were normalized by the intensity at  $q \rightarrow 0$ . The evolution of the  $l(q \rightarrow 0)$  with aescin content is shown in the inset of panel (b).

### Thickness pair distance distribution functions from SAXS

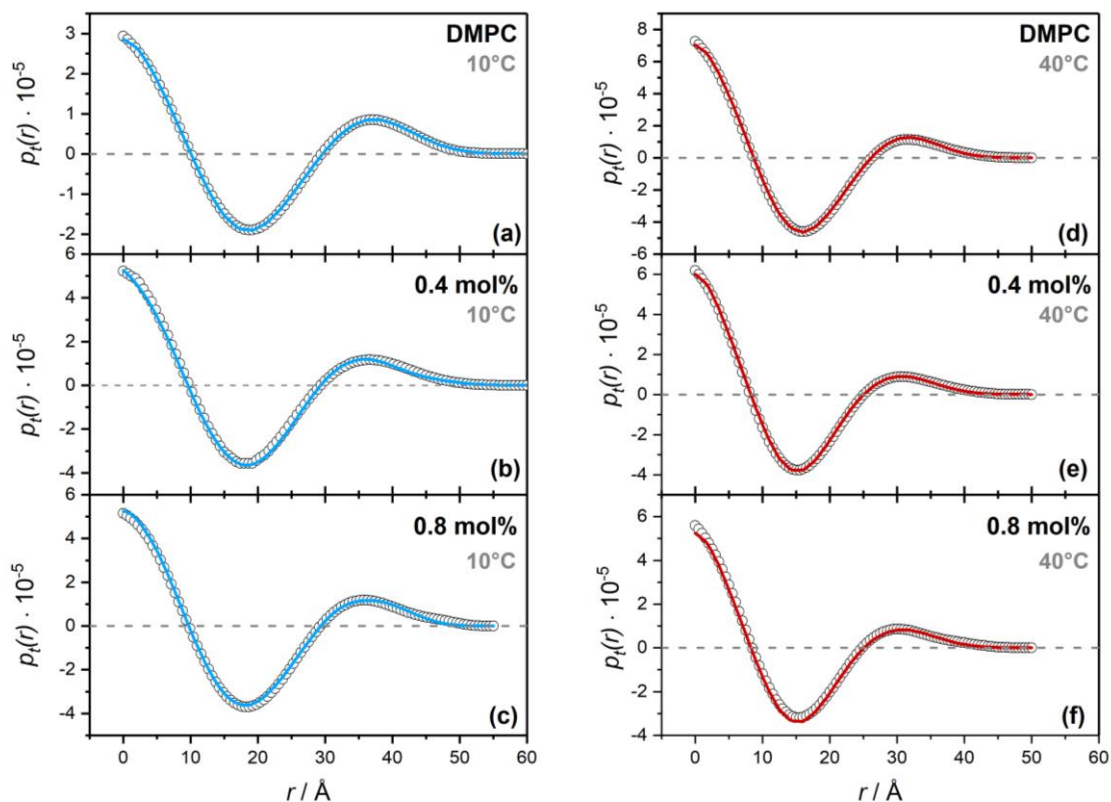

**Figure S3:** Thickness pair distance distribution functions ( $p_t(r)$ ) (circles) for vesicle suspensions of DMPC and DMPC containing low amounts of aescin at (a)-(c) 10 °C and (d)-(f) 40 °C.  $p_t(r)$  functions were obtained using GIFT.<sup>1</sup> Solid lines represent the calculated  $p_t(r)$  functions by DECON for deconvolution and calculation of the ED profiles ( $\Delta\rho$ ) in Fig. 9 in the manuscript.<sup>2</sup>

### References

- (1) Bergmann, A.; Fritz, G.; Glatter, O. *Journal of Applied Crystallography* 2000, 33, 1212-1216.
- (2) Mittelbach, R.; Glatter, O. *Journal of Applied Crystallography* 1998, 31, 600-608.
